# Supplementary material for: History of a prolific family: the Hes/Hey-related genes of the annelid Platynereis
Source: PubMed Central journal article supplement (PMC4172395; doi:10.1186/2041-9139-5-29), 2014-09-05

A) HES

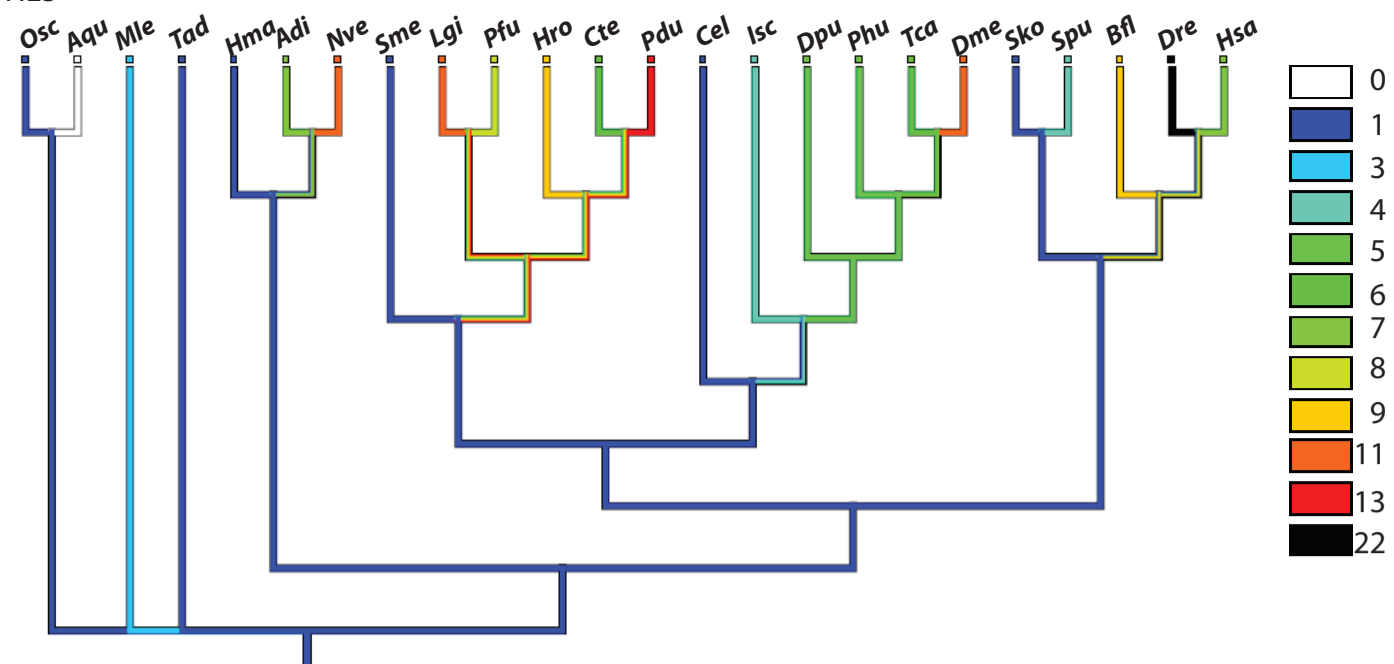

B) HEY

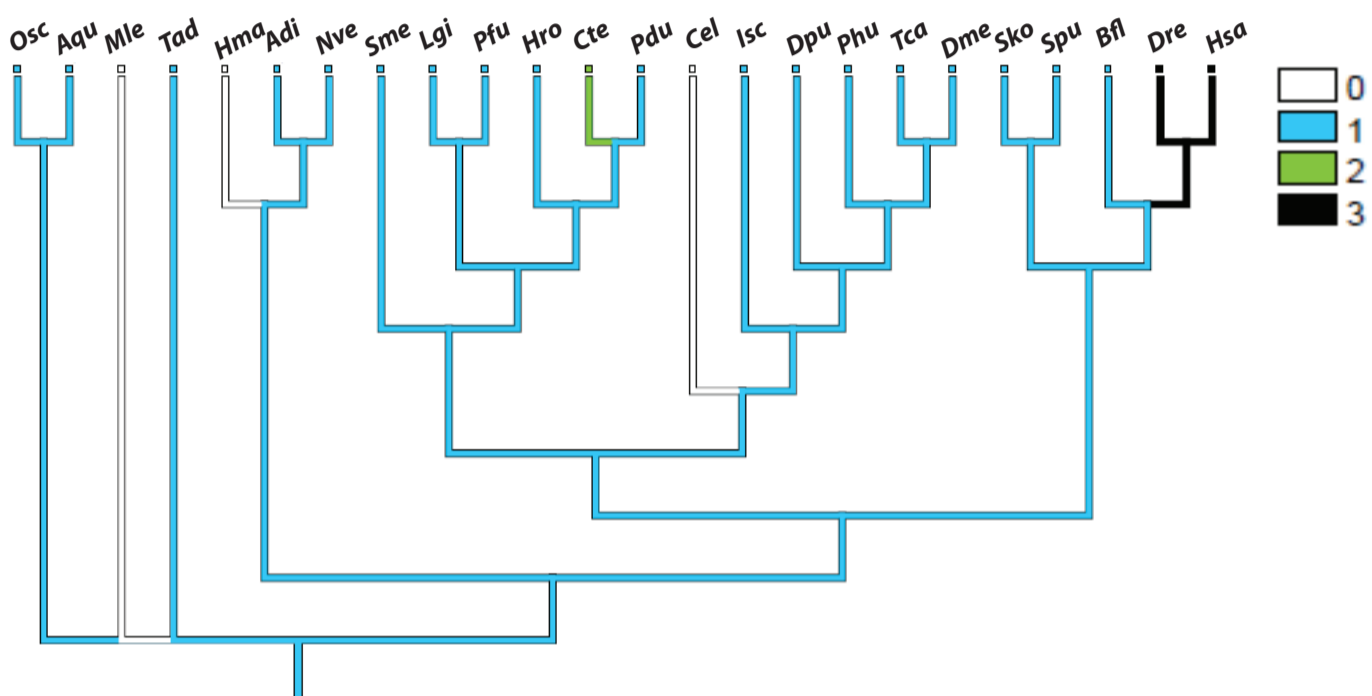

C) NeuroD

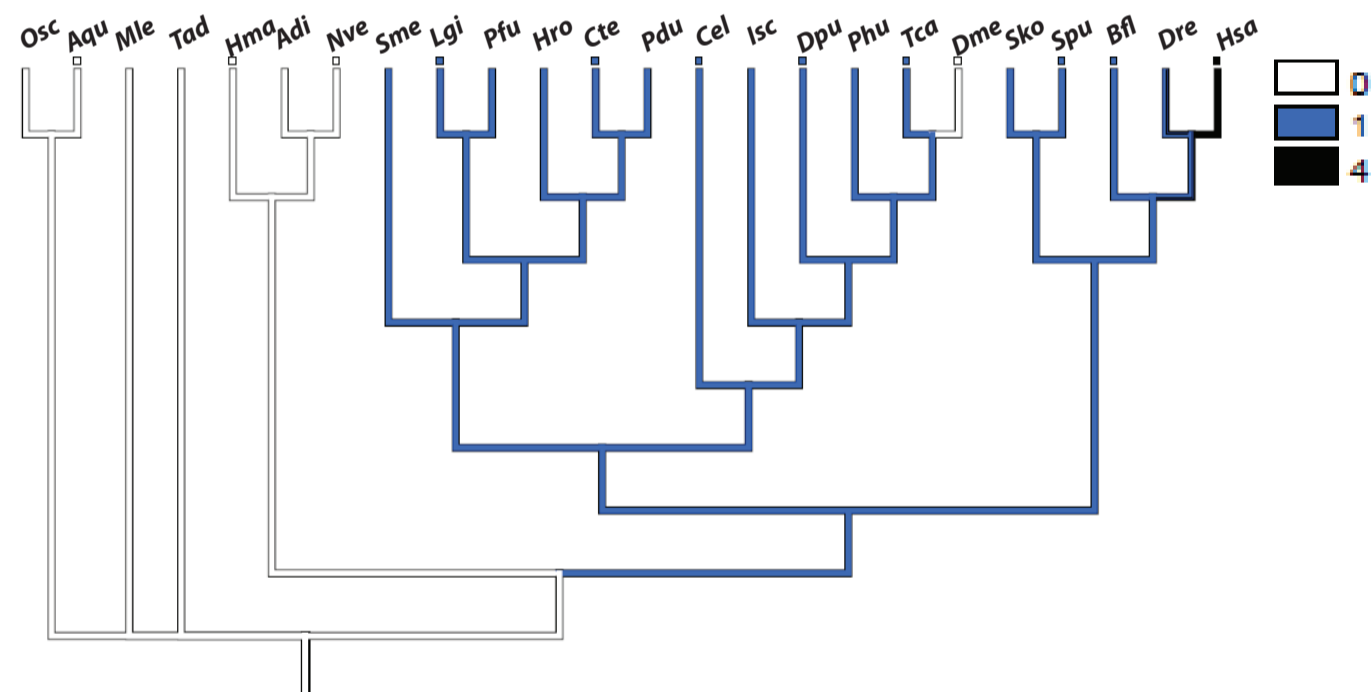

D) Clock

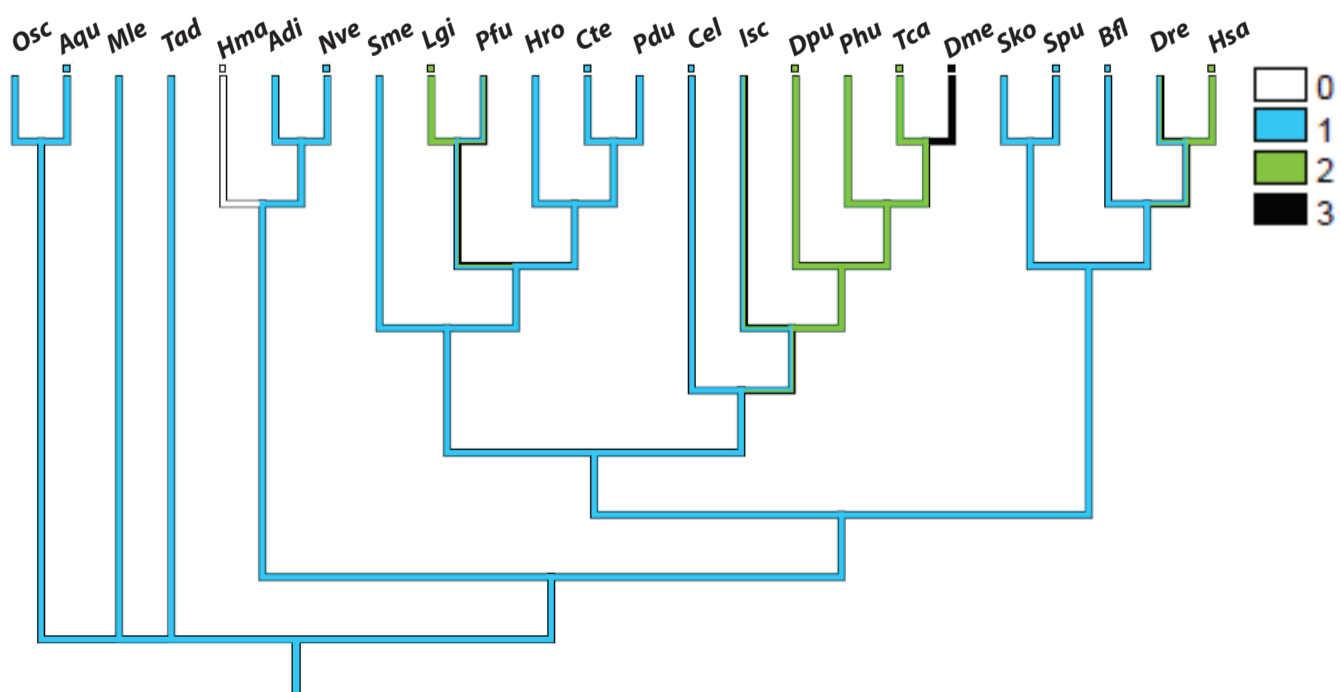

Supplement: 2041-9139-5-29-S3.pdf [file 2041-9139-5-29-S3.pdf]
